# Supplementary figures and images for: Optimisation of cancer classification by machine learning generates an enriched list of candidate drug targets and biomarkers
Source: Royal Society of Chemistry journal article supplement (doi:10.1039/c9mo00198k), 2020-02-13

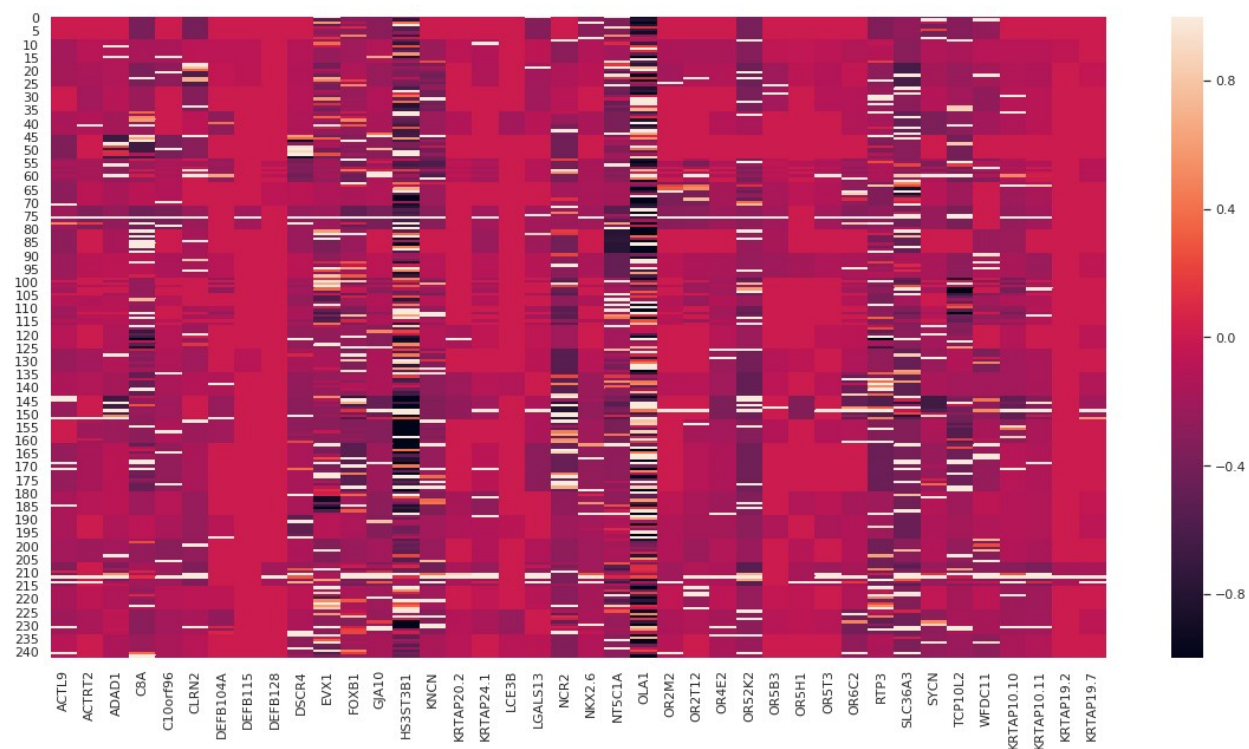

Supplementary Figure 1. Heatmap of a subset of samples of each cancer type for the top 40 genes.

Supplement: c9mo00198k1.pdf [file c9mo00198k1.pdf]

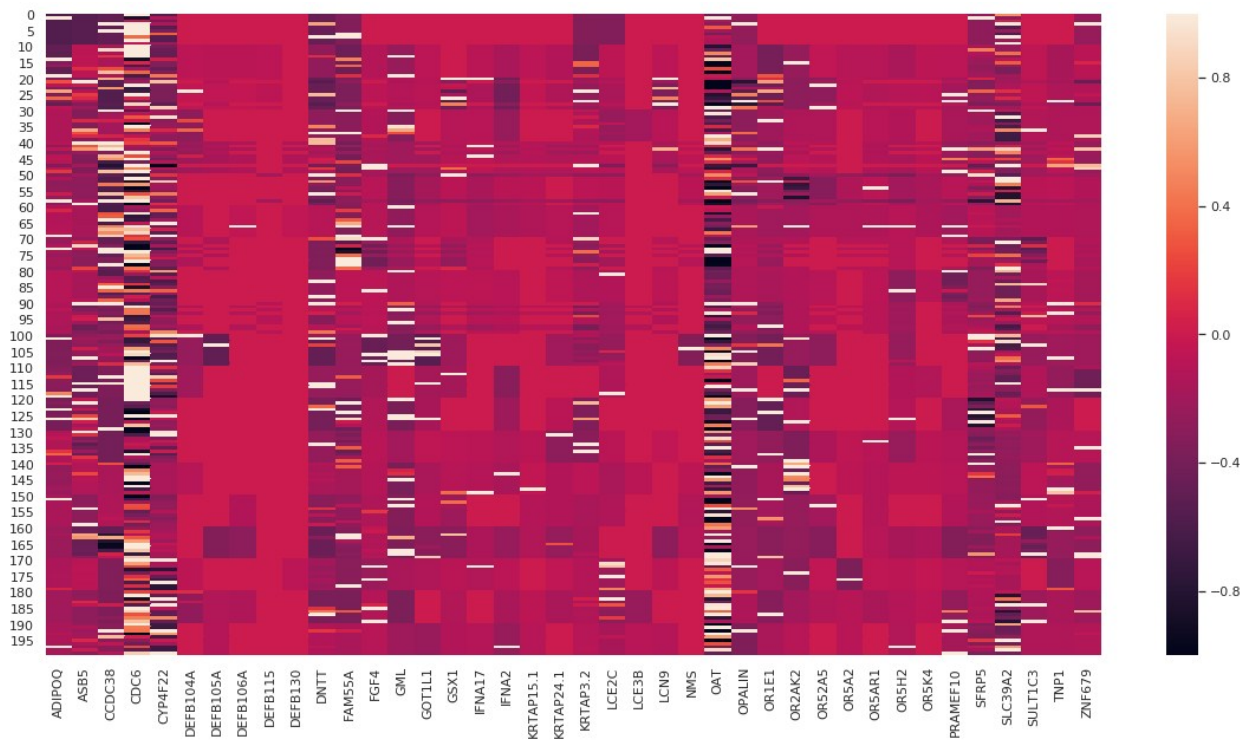

Supplementary Figure 2. Heatmap of a subset of samples of each primary site for the top 40 genes.

Supplement: c9mo00198k2.pdf [file c9mo00198k2.pdf]
